# Supplementary material for: Evidence for Natural Products as Alternative Wound-Healing Therapies
Source: MDPI journal article supplement (doi:10.3390/biom13030444), 2023-02-27
Supplement: s1 [file s1]

**Table S1: Summary of clinical trials carried out using natural products for wound healing in the last 20 years sourced using a PubMed search, using the search criteria “ulcer” + “plant”.**

| Test substance                                                                                                                                                                                                         | Number of participants | Randomised /blinded            | Outcomes                                                                                                                                                                                           | Reference                  |
|------------------------------------------------------------------------------------------------------------------------------------------------------------------------------------------------------------------------|------------------------|--------------------------------|----------------------------------------------------------------------------------------------------------------------------------------------------------------------------------------------------|----------------------------|
| <b>Diabetic Foot Ulcers</b>                                                                                                                                                                                            |                        |                                |                                                                                                                                                                                                    |                            |
| <i>Vasconcellea pubescens</i> A.DC. ( <i>Vasconcellea cundinamarcensis</i> (ex- <i>Carica candamarcensis</i> )) (Mountain Papaya)                                                                                      | 50                     | Randomised, double blinded     | Phase 2 clinical study. Demonstrated enhanced wound closure ability compared to control (currently used wound care treatment), with 11 patients vs 5 exhibiting 100% wound closure, respectively.  | Tonaco et al. (2018)       |
| <i>Pinus pinaster</i> Aiton (Pycnogenol®) (French maritime pine)                                                                                                                                                       | 30                     | Randomised                     | Combination of oral and topical treatment resulted in 89% healed compared to 61% healed in untreated control.                                                                                      | Belcaro et al. (2006)      |
| <i>Calendula officinalis</i> L. hydroglycolic extract (pot marigold)                                                                                                                                                   | 41                     | All treated with test compound | 78% of patients exhibited complete wound closure within 30 weeks of treatment.                                                                                                                     | Buzzi et al. (2016)        |
| Polyherbal cream containing ( <i>Glycyrrhiza glabra</i> L., <i>Musa × paradisiaca</i> L., <i>Curcuma longa</i> L., <i>Pandanus odoratissimus</i> L.f., <i>Aloe vera</i> (L.) Burm.f. and <i>Cocos nucifera</i> L. oil) | 38                     | Not randomised                 | Polyherbal cream induced a similar wound healing response compared to the silver sulphadiazine cream, for ulcer size and healing duration, with 43.1 and 43.6 days to heal for each, respectively. | Viswanath an et al. (2011) |
| Combination gel containing <i>Aloe vera</i> (L.) Burm.f. ( <i>A. vera</i> ) and <i>Plantago major</i> L. (Plantavera 10% gel)                                                                                          | 40                     | Randomised, double blinded     | Plantavera gel induced a significant improvement in total ulcer score compared to placebo control within 4 weeks, with 70% complete recovery compared to no complete recovery, respectively.       | Najafian et al. (2019)     |

|                                                                                                                                                                                                      |                                       |                                                                   |                                                                                                                                                                                 |                               |
|------------------------------------------------------------------------------------------------------------------------------------------------------------------------------------------------------|---------------------------------------|-------------------------------------------------------------------|---------------------------------------------------------------------------------------------------------------------------------------------------------------------------------|-------------------------------|
| <i>Ageratina pichinchensis</i> (Kunth) (axihuitl)                                                                                                                                                    | 34                                    | Randomised, double blinded                                        | Reduced time needed for complete wound healing with <i>A. pichinchensis</i> extract ( $65.47 \pm 47.08$ days) compared to control ( $77.46 \pm 50.8$ days).                     | Romero-Cerecero et al. (2015) |
| <b>Pressure Ulcers</b>                                                                                                                                                                               |                                       |                                                                   |                                                                                                                                                                                 |                               |
| <i>Symphytum</i> × <i>uplandicum</i> Nyman                                                                                                                                                           | 151 participants, 184 pressure ulcers | All treated with test compound                                    | At the completion of the study (25-30 days), 170 out of a total 184 pressure ulcers were deemed as completely healed.                                                           | Stepan et al. (2013)          |
| <i>Picea abies</i> L. (Norway spruce)                                                                                                                                                                | 22 participants, 29 pressure ulcers   | Randomised                                                        | Complete healing evident in 94% of ulcers treated with the <i>P. abies</i> salve, compared to 36% in the control group.                                                         | Sipponen et al. (2008)        |
| <b>Venous Leg Ulcers</b>                                                                                                                                                                             |                                       |                                                                   |                                                                                                                                                                                 |                               |
| <i>Triticum aestivum</i> L., ( <i>Triticum vulgare</i> ) (Wheat plant)                                                                                                                               | 50                                    | Randomised into delivery vehicles; all treated with test compound | All five delivery systems/medical devices induced a reduction in wound ulcer size; the three best delivery systems were cream, gauze and hydrogel.                              | Romanelli et al. (2015)       |
| <i>Mimosa tenuiflora</i> (Willd.) Poiret ( <i>Leguminosae</i> ) cortex extract                                                                                                                       | 40                                    | Randomised, double blinded                                        | <i>M. tenuiflora</i> cortex extract demonstrated an enhanced healing response through reduced ulcer area following treatment with the hydrogel containing the control hydrogel. | Rivera-Arce et al. (2007)     |
| Plantoderm <sup>®</sup> ointment containing alcohol extracts of ( <i>Calendula officinalis</i> L., <i>Symphytum officinale</i> L., <i>Achillea millefolium</i> L., and <i>Salvia officinalis</i> L.) | 32                                    | Randomised                                                        | Plantoderm <sup>®</sup> ointment treatment showed 42.68% ulcer surface reduction, compared to 35.65% reduction with the control.                                                | Binić et al. (2010)           |

|                                                                                                                                                                              |    |                                |                                                                                                                                                                                                                         |                          |
|------------------------------------------------------------------------------------------------------------------------------------------------------------------------------|----|--------------------------------|-------------------------------------------------------------------------------------------------------------------------------------------------------------------------------------------------------------------------|--------------------------|
| <i>Aesculus hippocastanum</i> (L.)<br>(Horsechestnut seed extract)                                                                                                           | 54 | Randomised, triple-blinded     | Horsechestnut seed extract treatment resulted in reduced wound dressing changes (1.1) compared to conventional wound care treatment (2.48) by the end of the study.                                                     | Leach et al. (2006)      |
| Herbadermal® comprised of extracts of garlic ( <i>Allium sativum</i> L.), St John's wort ( <i>Hypericum perforatum</i> L.), and calendula ( <i>Calendula officinalis</i> L.) | 25 | All treated with test compound | Herbadermal® treatment resulted in significant reduction in ulcer size over the 7-week study duration, with 99.1% improvement in epithelialisation.                                                                     | Kundaković et al. (2012) |
| <i>A. vera</i> /olive oil ( <i>Olea europaea</i> L.) combination cream                                                                                                       | 60 | Randomised, double blinded     | Treatment with the <i>A. vera</i> /olive oil combination cream resulted in a significantly enhanced response over several wound healing criteria, including wound size, amount of exudate and peripheral tissue oedema. | Panahi et al. (2015)     |
